# Supplementary material for: Consumers’ Patient Portal Preferences and Health Literacy: A Survey Using Crowdsourcing
Source: PubMed Central journal article supplement (PMC4917738; doi:10.2196/resprot.5122), 2016-06-08
Supplement: resprot_v5i2e104_app1.pdf [file resprot_v5i2e104_app1.pdf]

## Appendix 4.

Thank you for participating in this study to gather opinions about patient portals and lung cancer screening knowledge. Patient portals allow patients to view the information from their medical record online. Examples of tasks that can be done with a portal include reviewing medical reports and looking at educational information, such as health encyclopedia content. The goal of this questionnaire is to study the potential impact of patient portals, and your knowledge of lung cancer screening.

To fill out questions 1-7 of this survey, we ask that you put yourself in the role of a typical lung cancer screening patient. A typical lung cancer screening patient is age 55-77 years old. They have either: smoked one pack or more a day for 30 years, or smoked one pack a day or more for 20 years and been exposed to one or more risk factors. Risk factors include: exposure to cancer causing agents (e.g., arsenic, asbestos), a personal history of cancer, or family history of cancer. They may or may not be current smokers.

Once a patient is selected for screening, they receive a low dose CT scan of their lungs. A CT scan is taken by a machine that uses x-rays to create a set of images showing the inside of the lungs. The images are reviewed by an expert. Depending on what the expert sees in the images, the patient may be asked to return for a scan in another year, or advised to undergo additional follow-up exams, such as: additional medical imaging or a biopsy where a small amount of lung tissue is removed and studied under a microscope. While 10-20% of people who get a CT scan require additional follow-up exams, almost all of them (95%) will not have cancer.

Please answer all questions. You will not be compensated if you do not answer all questions.

For the following questions 1-7, please put yourself in the role of the lung cancer screening patient as outlined above.

Please read each statement below and then select the circle of the number that most closely reflects your opinion, 7 being completely agree, and 1 being completely disagree.

**1. Using a portal can make me accomplish tasks (e.g., review my diagnoses and tests) quickly in managing my personal health information. (7 completely agree, 1 completely disagree.)**

1 2 3 4 5 6 7

**2. A portal can be useful to manage my personal health information. (7 completely agree, 1 completely disagree.)**

1 2 3 4 5 6 7

**3. It should be easy to become skillful at using a portal. (7 completely agree, 1 completely disagree.)**

1 2 3 4 5 6 7

**4. Portals are not difficult to use. (7 completely agree, 1 completely disagree.)**

1 2 3 4 5 6 7

**5. A personalized portal can suit my needs of managing my personal health information. (7 completely agree, 1**

**completely disagree.)**

1 2 3 4 5 6 7

**6. Using a portal can assist my face to face communication with my healthcare providers. (7 completely agree, 1 completely disagree.)**

1 2 3 4 5 6 7

**7. Using a portal with a health encyclopedia can provide me with healthcare knowledge and education. (7 completely agree, 1 completely disagree.)**

1 2 3 4 5 6 7

**For the following questions 8-18, please check the circle of the best answer. Please do not look up the answer online if you are unsure. If you are unsure, please check the circle "Don't know".**

**8. CT images are made with X-rays.**

Yes  No  Don't know

**9. To complete a CT scan, subjects must undress their upper body.**

Yes  No  Don't know

**10. In the past, before the CT scan was introduced, the chance of dying due to lung cancer after diagnosis was:**

Very High  Somewhat High  Somewhat Low  Very Low

Don't know

**11. Lung cancer is one of the most common cancers.**

Yes  No  Don't know

**12. A change of cough pattern is a frequent sign of lung cancer.**

Yes  No  Don't know

**13. Coughing up blood is a frequent sign of lung cancer.**

Yes  No  Don't know

**14. Lung cancer is hereditary.**

Yes  No  Don't know

**15. Lung cancer is infectious.**

Yes  No  Don't know

**16. A person can have lung cancer without complaint.**

Yes  No  Don't know

**17. Someone who has quit smoking has a higher risk of developing lung cancer than someone who has never smoked.**

Yes     No     Don't know

**In the following questions 18-30, please fill in the circle that best reflects you. If you have no opinion or would like not to answer, please check the circle marked "Prefer not to answer".**

**18. Do you suffer from a chronic illness (e.g., diabetes, hypertension)?**

Yes

No

Prefer not to answer

**19. What is your highest level of education?**

High School

Some college

Associate's degree

Bachelor's degree

Master's degree or beyond

Other

Prefer not to answer

**20. What is your age group?**

18-30

31-40

41-50

51-60

61-70

71 & beyond

Prefer not to answer

**21. What is your sex?**

Male

Female

I use a different word to describe myself: \_\_\_\_\_

Prefer not to answer

**22. What is your approximate annual income range?**

\$0-\$35,000

\$36,000-\$50,000

\$51,000-\$75,000

\$76,000 or greater

Prefer not to answer

**23. What race(s) best represent you? Please check all that apply.**

White

Asian

American Indian or Alaska Native

Native Hawaiian or Other Pacific Islander

Black or African American

More than one race

Unknown or not reported

Prefer not to answer

**24. In one week, how many hours do you spend on the Internet?**

0 hours

1-5 hours

6-10 hours

11 hours or more

Prefer not to answer

**25. How many times have you used a patient health portal?**

0 times (never)

1-10 times

11-50 times

51 times or more

Prefer not to answer

**26. Please check all concerns about using a portal to access your medical information that apply to you.**

I don't want to use a portal to access my information.

Accessing information via a portal will increase my anxiety.

I am concerned about unauthorized access.

I am concerned about incorrect data being entered by healthcare personal.

I have other concerns (please list them here) \_\_\_\_\_.

I have no concerns.

Prefer not to answer

**27. Please list in a few words what concerns you might have about using a portal. If you have no concerns, please write "no concerns".**

**28. Please list in a few words what effect, if any, using a portal would have on you. If it would have no effect, please write "no effect".**

**29. Please enter your five digit zip code**

**30. Do you know anyone who has or had lung cancer?**

Yes

No

Prefer not to answer
