# Supplementary material for: Consumers’ Patient Portal Preferences and Health Literacy: A Survey Using Crowdsourcing
Source: PubMed Central journal article supplement (PMC4917738; doi:10.2196/resprot.5122), 2016-06-08
Supplement: resprot_v5i2e104_app2.pdf [file resprot_v5i2e104_app2.pdf]

## Appendix 1.

Table 1. Demographic variables.

| Predictors                         | Variable choices                                   | Condensed values                                                            |
|------------------------------------|----------------------------------------------------|-----------------------------------------------------------------------------|
| <b>Age</b>                         |                                                    |                                                                             |
|                                    | 18-20                                              | 40 years and younger                                                        |
|                                    | 21-30                                              | 41 years and older (includes one prefer not to answer)                      |
|                                    | 31-40                                              |                                                                             |
|                                    | 41-50                                              |                                                                             |
|                                    | 51-60                                              |                                                                             |
|                                    | 61-70                                              |                                                                             |
|                                    | 71-80                                              |                                                                             |
|                                    | Prefer not to answer                               |                                                                             |
| <b>Income</b>                      |                                                    |                                                                             |
|                                    | \$0-35,000                                         | \$50,000 or less                                                            |
|                                    | \$36,000-50,000                                    | \$51,000 or more                                                            |
|                                    | \$51,000-75,000                                    | Prefer not to answer                                                        |
|                                    | \$76,000 and above                                 |                                                                             |
|                                    | Prefer not to answer                               |                                                                             |
| <b>Education</b>                   |                                                    |                                                                             |
|                                    | High school                                        | Bachelor's degree or less                                                   |
|                                    | Some college                                       | Master's degree or more                                                     |
|                                    | Associates degree                                  | Data contained no prefer not to answer cases                                |
|                                    | Bachelor's degree                                  |                                                                             |
|                                    | Master's degree and beyond                         |                                                                             |
|                                    | Prefer not to answer                               |                                                                             |
| <b>Sex</b>                         |                                                    |                                                                             |
|                                    | Male                                               |                                                                             |
|                                    | Female                                             |                                                                             |
|                                    | I use a different word to describe myself:         | All others eliminated                                                       |
|                                    | Prefer not to answer                               |                                                                             |
| <b>Races (Check all the apply)</b> |                                                    |                                                                             |
|                                    | White                                              | White                                                                       |
|                                    | Asian                                              | All other races (includes prefer not to answer and unknown or not reported) |
|                                    | American Indian or Alaska Native Hawaiian or Other |                                                                             |
|                                    | Black or African American                          |                                                                             |
|                                    | More than one race                                 |                                                                             |
|                                    | Unknown or not reported                            |                                                                             |
|                                    | Prefer not to answer                               |                                                                             |

Table 2. Predictor variables that are lung cancer and information need specific.

| Predictors             | Variable choices     | Condensed values                                 |
|------------------------|----------------------|--------------------------------------------------|
|                        |                      |                                                  |
| <b>Portal Use</b>      |                      |                                                  |
|                        | Never                | 10 times or less (includes prefer not to answer) |
|                        | 1-10 times           | 11 times or more                                 |
|                        | 11-50 times          |                                                  |
|                        | 51 times or more     |                                                  |
|                        | Prefer not to answer |                                                  |
| <b>Hours Online</b>    |                      |                                                  |
|                        | 0 hours              | 10 hours or less (includes prefer not to answer) |
|                        | 1-5 hours            | 11 hours or more                                 |
|                        | 6-10 hours           |                                                  |
|                        | 11 hours or more     |                                                  |
|                        | Prefer not to answer |                                                  |
| <b>Chronic Illness</b> |                      |                                                  |
|                        | Yes                  | Yes                                              |
|                        | No                   | No (includes prefer not to answer)               |
|                        | Prefer not to answer |                                                  |
| <b>Smoking Habit</b>   |                      |                                                  |
|                        | Yes                  | Yes                                              |
|                        | No                   | No (includes prefer not to answer)               |
|                        | Prefer not to answer |                                                  |

Table 3. Outcome variables for patient portal preferences.

| Outcome                                                                                                                                      | Variable choices      | Binary values  |
|----------------------------------------------------------------------------------------------------------------------------------------------|-----------------------|----------------|
| <b>Using a portal with a health encyclopedia can provide me with healthcare knowledge and education.</b>                                     |                       |                |
|                                                                                                                                              | Likert scale<br>o 7-1 | Agree (5-7)    |
|                                                                                                                                              |                       | Disagree (1-4) |
| <b>Using a portal can assist my face to face communication with my healthcare providers.</b>                                                 |                       |                |
|                                                                                                                                              | Likert scale<br>o 7-1 | Agree (5-7)    |
|                                                                                                                                              |                       | Disagree (1-4) |
| <b>A personalized portal can suit my needs of managing my personal health information.</b>                                                   |                       |                |
|                                                                                                                                              | Likert scale<br>o 7-1 | Agree (5-7)    |
|                                                                                                                                              |                       | Disagree (1-4) |
| <b>Portals are not difficult to use.</b>                                                                                                     |                       |                |
|                                                                                                                                              | Likert scale<br>o 7-1 | Agree (5-7)    |
|                                                                                                                                              |                       | Disagree (1-4) |
| <b>It should be easy to become skillful at using a portal.</b>                                                                               |                       |                |
|                                                                                                                                              | Likert scale<br>o 7-1 | Agree (5-7)    |
|                                                                                                                                              |                       | Disagree (1-4) |
| <b>A portal can be useful to manage my personal health information.</b>                                                                      |                       |                |
|                                                                                                                                              | Likert scale<br>o 7-1 | Agree (5-7)    |
|                                                                                                                                              |                       | Disagree (1-4) |
| <b>Using a portal can make me accomplish tasks (e.g., review my diagnoses and tests) quickly in managing my personal health information.</b> |                       |                |
|                                                                                                                                              | Likert scale<br>o 7-1 | Agree (5-7)    |
|                                                                                                                                              |                       | Disagree (1-4) |

Table 4. Outcome variables for lung cancer screening.

| Outcome                                                                                                            | Variable choices | Binary values          |
|--------------------------------------------------------------------------------------------------------------------|------------------|------------------------|
| <b>In the past, before the CT scan was introduced, the chance of dying due to lung cancer after diagnosis was:</b> |                  |                        |
|                                                                                                                    | High             | Correct (high)         |
|                                                                                                                    | Somewhat high    | Incorrect (all others) |
|                                                                                                                    | Somewhat low     |                        |
|                                                                                                                    | Low              |                        |
| <b>A change of cough pattern is a frequent sign of lung cancer.</b>                                                |                  |                        |
|                                                                                                                    | Yes              | Correct (yes)          |
|                                                                                                                    | No               | Incorrect (all others) |
|                                                                                                                    | Don't know       |                        |
| <b>Someone who has quit smoking has a higher risk of developing lung cancer than someone who has never smoked.</b> |                  |                        |
|                                                                                                                    | Yes              | Correct (yes)          |
|                                                                                                                    | No               | Incorrect (all others) |
|                                                                                                                    | Don't know       |                        |
| <b>A person can have lung cancer without complaint.</b>                                                            |                  |                        |
|                                                                                                                    | Yes              | Correct (yes)          |
|                                                                                                                    | No               | Incorrect (all others) |
|                                                                                                                    | Don't know       |                        |
| <b>Lung cancer is infectious.</b>                                                                                  |                  |                        |
|                                                                                                                    | Yes              | Correct (no)           |
|                                                                                                                    | No               | Incorrect (all others) |
|                                                                                                                    | Don't know       |                        |
| <b>Lung cancer is hereditary.</b>                                                                                  |                  |                        |
|                                                                                                                    | Yes              | Correct (no)           |
|                                                                                                                    | No               | Incorrect (all others) |
|                                                                                                                    | Don't know       |                        |
| <b>Coughing up blood is a frequent sign of lung cancer.</b>                                                        |                  |                        |
|                                                                                                                    | Yes              | Correct (yes)          |
|                                                                                                                    | No               | Incorrect (all others) |
|                                                                                                                    | Don't know       |                        |
| <b>Lung cancer is one of the most common cancers.</b>                                                              |                  |                        |
|                                                                                                                    | Yes              | Correct (yes)          |
|                                                                                                                    | No               | Incorrect (all others) |
|                                                                                                                    | Don't know       |                        |
| <b>To complete a CT scan, subjects must undress their upper body.</b>                                              |                  |                        |
|                                                                                                                    | Yes              | Correct (no)           |
|                                                                                                                    | No               | Incorrect (all others) |
|                                                                                                                    | Don't know       |                        |
| <b>CT images are made with X-rays.</b>                                                                             |                  |                        |
|                                                                                                                    | Yes              | Correct (yes)          |
|                                                                                                                    | No               | Incorrect (all others) |
|                                                                                                                    | Don't know       |                        |
