# Supplementary material for: Consumers’ Patient Portal Preferences and Health Literacy: A Survey Using Crowdsourcing
Source: PubMed Central journal article supplement (PMC4917738; doi:10.2196/resprot.5122), 2016-06-08
Supplement: resprot_v5i2e104_app3.pdf [file resprot_v5i2e104_app3.pdf]

## Appendix 2.

Table 1. Outcome frequencies for patient portal preferences.

| Outcome                                                                                                                          | 1 | 2  | 3  | 4  | 5   | 6   | 7   | Total |
|----------------------------------------------------------------------------------------------------------------------------------|---|----|----|----|-----|-----|-----|-------|
|                                                                                                                                  |   |    |    |    |     |     |     |       |
| <b>Using a portal with a health encyclopedia can provide me with healthcare knowledge and education.</b>                         | 5 | 7  | 16 | 40 | 104 | 125 | 176 | 473   |
| <b>Using a portal can assist my face to face communication with my healthcare providers.</b>                                     | 6 | 12 | 27 | 63 | 120 | 117 | 128 | 473   |
| <b>A personalized portal can suit my needs of managing my personal health information.</b>                                       | 1 | 9  | 11 | 21 | 93  | 147 | 191 | 473   |
| <b>Portals are not difficult to use.</b>                                                                                         | 9 | 17 | 39 | 85 | 109 | 112 | 102 | 473   |
| <b>It should be easy to become skillful at using a portal.</b>                                                                   | 4 | 5  | 27 | 52 | 107 | 117 | 161 | 473   |
| <b>A portal can be useful to manage my personal health information.</b>                                                          | 2 | 5  | 5  | 23 | 73  | 131 | 234 | 473   |
| <b>Using a portal can make me accomplish tasks (e.g., review my diagnoses and tests) quickly in managing my personal health.</b> | 2 | 4  | 8  | 34 | 109 | 141 | 175 | 473   |

Table 2. Outcome frequencies for lung cancer screening.

| Outcome                                                                                                            | Yes       | No             | I don't know  |     |              | Total |
|--------------------------------------------------------------------------------------------------------------------|-----------|----------------|---------------|-----|--------------|-------|
|                                                                                                                    |           |                |               |     |              |       |
| <b>Someone who has quit smoking has a higher risk of developing lung cancer than someone who has never smoked.</b> | 363       | 60             | 50            |     |              | 473   |
| <b>A change of cough pattern is a frequent sign of lung cancer.</b>                                                | 248       | 55             | 170           |     |              | 473   |
| <b>A person can have lung cancer without complaint.</b>                                                            | 302       | 50             | 121           |     |              | 473   |
| <b>Lung cancer is infectious.</b>                                                                                  | 13        | 438            | 22            |     |              | 473   |
| <b>Lung cancer is hereditary.</b>                                                                                  | 97        | 239            | 137           |     |              | 473   |
| <b>Coughing up blood is a frequent sign of lung cancer.</b>                                                        | 352       | 20             | 101           |     |              | 473   |
| <b>Lung cancer is one of the most common cancers.</b>                                                              | 378       | 42             | 53            |     |              | 473   |
| <b>To complete a CT scan, subjects must undress their upper body.</b>                                              | 141       | 202            | 130           |     |              | 473   |
| <b>CT images are made with X-rays.</b>                                                                             | 282       | 102            | 89            |     |              | 473   |
|                                                                                                                    |           |                |               |     |              |       |
|                                                                                                                    | Very High | Some-what High | Some-what Low | Low | I don't know | Total |
| <b>In the past, before the CT scan was introduced, the chance of dying due to lung cancer after diagnosis was:</b> | 182       | 186            | 17            | 6   | 82           | 473   |
