# Supplementary material for: Consumers’ Patient Portal Preferences and Health Literacy: A Survey Using Crowdsourcing
Source: PubMed Central journal article supplement (PMC4917738; doi:10.2196/resprot.5122), 2016-06-08
Supplement: resprot_v5i2e104_app4.pdf [file resprot_v5i2e104_app4.pdf]

### Appendix 3.

Table 1. All results for portal preference questions univariate analysis: A. It should be easy to become skillful at using a portal. B. Using a portal can assist my face to face communication with my healthcare providers. C. Using a portal with a health encyclopedia can provide me with healthcare knowledge and education. D. A portal can be useful to manage my personal health information. E. Portals are not difficult to use. F. Using a portal can make me accomplish tasks (e.g., review my diagnoses and tests) quickly in managing my personal health information. G. A personalized portal can suit my needs of managing my personal health information.

|                        |                | A     | B     | C     | D      | E     | F     | G     |
|------------------------|----------------|-------|-------|-------|--------|-------|-------|-------|
| <b>Age</b>             |                |       |       |       |        |       |       |       |
|                        | <i>F</i> score | 1.358 | 1.662 | 1.222 | 1.150  | 0.574 | 1.312 | 1.346 |
|                        | <i>P</i>       | 0.221 | 0.116 | 0.289 | 0.330  | 0.777 | 0.243 | 0.227 |
| <b>Education</b>       |                |       |       |       |        |       |       |       |
|                        | <i>F</i> score | 0.277 | 1.679 | 1.173 | 0.919  | 0.299 | 1.094 | 1.561 |
|                        | <i>P</i>       | 0.893 | 0.154 | 0.322 | 0.453  | 0.878 | 0.359 | 0.327 |
| <b>Income</b>          |                |       |       |       |        |       |       |       |
|                        | <i>F</i> score | 0.950 | 0.771 | 1.424 | 0.278  | 0.682 | 0.567 | 0.531 |
|                        | <i>P</i>       | 0.440 | 0.544 | 0.225 | 0.892  | 0.604 | 0.687 | 0.713 |
| <b>Smoking Habit</b>   |                |       |       |       |        |       |       |       |
|                        | <i>F</i> score | 0.914 | 1.099 | 1.117 | 1.875  | 0.801 | 0.519 | 1.483 |
|                        | <i>P</i>       | 0.402 | 0.334 | 0.328 | 0.155  | 0.450 | 0.596 | 0.228 |
| <b>Hours Online</b>    |                |       |       |       |        |       |       |       |
|                        | <i>F</i> score | 1.217 | 0.191 | 1.678 | 1.009  | 0.288 | 2.349 | 1.876 |
|                        | <i>P</i>       | 0.303 | 0.903 | 0.171 | 0.388  | 0.834 | 0.072 | 0.133 |
| <b>Sex</b>             |                |       |       |       |        |       |       |       |
|                        | <i>F</i> score | 2.277 | 3.089 | 0.442 | 0.293  | 0.339 | 1.718 | 0.001 |
|                        | <i>P</i>       | 0.108 | 0.108 | 0.172 | 0.136  | 0.009 | 0.044 | 0.172 |
| <b>Chronic Illness</b> |                |       |       |       |        |       |       |       |
|                        | <i>F</i> score | 6.622 | 0.133 | 0.701 | 6.026  | 0.523 | 7.053 | 3.413 |
|                        | <i>P</i>       | 0.001 | 0.876 | 0.496 | 0.003  | 0.593 | 0.001 | 0.034 |
| <b>Race</b>            |                |       |       |       |        |       |       |       |
|                        | <i>F</i> score | 0.599 | 1.016 | 0.708 | -0.173 | 0.381 | 0.508 | 0.187 |
|                        | <i>P</i>       | 0.550 | 0.310 | 0.479 | 0.863  | 0.704 | 0.612 | 0.852 |
| <b>Portal Use</b>      |                |       |       |       |        |       |       |       |
|                        | <i>F</i> score | 3.600 | 0.852 | 2.803 | 2.803  | 2.203 | 4.252 | 4.317 |
|                        | <i>P</i>       | 0.007 | 0.493 | 0.025 | 0.025  | 0.068 | 0.002 | 0.002 |

Table 2. All Chi-square results for lung cancer screening knowledge questions univariate analysis: A. CT images are made with X-rays. B. To complete a CT scan, subjects must undress their upper body. C. In the past, before the CT scan was introduced, the chance of dying due to lung cancer after diagnosis was: D. Lung cancer is one of the most common cancers. E. A change of cough pattern is a frequent sign of lung cancer. F. Coughing up blood is a frequent sign of lung cancer. G. Lung cancer is hereditary. H. Lung cancer is infectious. I. A person can have lung cancer without complaint. J. Someone who has quit smoking has a higher risk of developing lung cancer than someone who has not smoked.

|                        |       | A     | B     | C     | D     | E     | F     | G     | H     | I     | J     |
|------------------------|-------|-------|-------|-------|-------|-------|-------|-------|-------|-------|-------|
| <b>Age</b>             |       |       |       |       |       |       |       |       |       |       |       |
|                        | $X^2$ | 16.57 | 20.39 | 40.25 | 5.71  | 11.21 | 10.92 | 23.20 | 9.71  | 15.74 | 9.93  |
|                        | $P$   | 0.280 | 0.118 | 0.063 | 0.973 | 0.669 | 0.692 | 0.057 | 0.783 | 0.329 | 0.767 |
| <b>Education</b>       |       |       |       |       |       |       |       |       |       |       |       |
|                        | $X^2$ | 6.15  | 6.63  | 34.58 | 12.26 | 8.73  | 2.61  | 10.32 | 7.25  | 13.50 | 12.50 |
|                        | $P$   | 0.630 | 0.576 | 0.005 | 0.140 | 0.365 | 0.956 | 0.243 | 0.510 | 0.096 | 0.130 |
| <b>Income</b>          |       |       |       |       |       |       |       |       |       |       |       |
|                        | $X^2$ | 6.39  | 8.18  | 16.22 | 9.90  | 16.63 | 17.00 | 8.09  | 11.00 | 11.10 | 11.01 |
|                        | $P$   | 0.603 | 0.416 | 0.437 | 0.272 | 0.034 | 0.030 | 0.425 | 0.202 | 0.196 | 0.201 |
| <b>Smoking Habit</b>   |       |       |       |       |       |       |       |       |       |       |       |
|                        | $X^2$ | 0.91  | 4.25  | 13.97 | 10.30 | 3.00  | 3.94  | 1.84  | 3.33  | 4.16  | 3.49  |
|                        | $P$   | 0.922 | 0.373 | 0.082 | 0.036 | 0.557 | 0.414 | 0.764 | 0.503 | 0.384 | 0.479 |
| <b>Hours Online</b>    |       |       |       |       |       |       |       |       |       |       |       |
|                        | $X^2$ | 15.68 | 18.01 | 11.70 | 0.97  | 7.45  | 3.99  | 10.35 | 13.93 | 6.45  | 4.32  |
|                        | $P$   | 0.016 | 0.006 | 0.469 | 0.986 | 0.281 | 0.677 | 0.110 | 0.030 | 0.375 | 0.633 |
| <b>Sex</b>             |       |       |       |       |       |       |       |       |       |       |       |
|                        | $X^2$ | 3.36  | 1.98  | 11.19 | 7.79  | 4.62  | 23.43 | 4.60  | 6.23  | 1.03  | 2.72  |
|                        | $P$   | 0.499 | 0.739 | 0.191 | 0.099 | 0.328 | 0.000 | 0.331 | 0.182 | 0.904 | 0.605 |
| <b>Chronic Illness</b> |       |       |       |       |       |       |       |       |       |       |       |
|                        | $X^2$ | 12.82 | 12.05 | 9.98  | 1.37  | 12.42 | 0.85  | 4.54  | 56.55 | 6.38  | 7.67  |
|                        | $P$   | 0.012 | 0.017 | 0.266 | 0.849 | 0.014 | 0.930 | 0.338 | 0.000 | 0.172 | 0.104 |
| <b>Race</b>            |       |       |       |       |       |       |       |       |       |       |       |
|                        | $X^2$ | 30.13 | 29.68 | 35.39 | 33.23 | 35.33 | 38.54 | 35.59 | 21.94 | 35.31 | 29.26 |
|                        | $P$   | 0.657 | 0.679 | 1.000 | 0.505 | 0.405 | 0.272 | 0.393 | 0.945 | 0.406 | 0.699 |
| <b>Portal Use</b>      |       |       |       |       |       |       |       |       |       |       |       |
|                        | $X^2$ | 9.93  | 10.92 | 9.90  | 4.22  | 5.37  | 6.14  | 9.95  | 34.80 | 8.38  | 10.16 |
|                        | $P$   | 0.269 | 0.206 | 0.871 | 0.837 | 0.717 | 0.631 | 0.268 | 0.000 | 0.396 | 0.254 |
